# Supplementary material for: Nuclear Export of Cyclin B Mediated by the Nup62 Complex is Required for Meiotic Initiation in Drosophila Males
Source: Preprints.org preprint supplement (doi:10.20944/preprints201912.0146.v1), 2019-12-11

Supplementary Fig.1 Okazaki et al.,

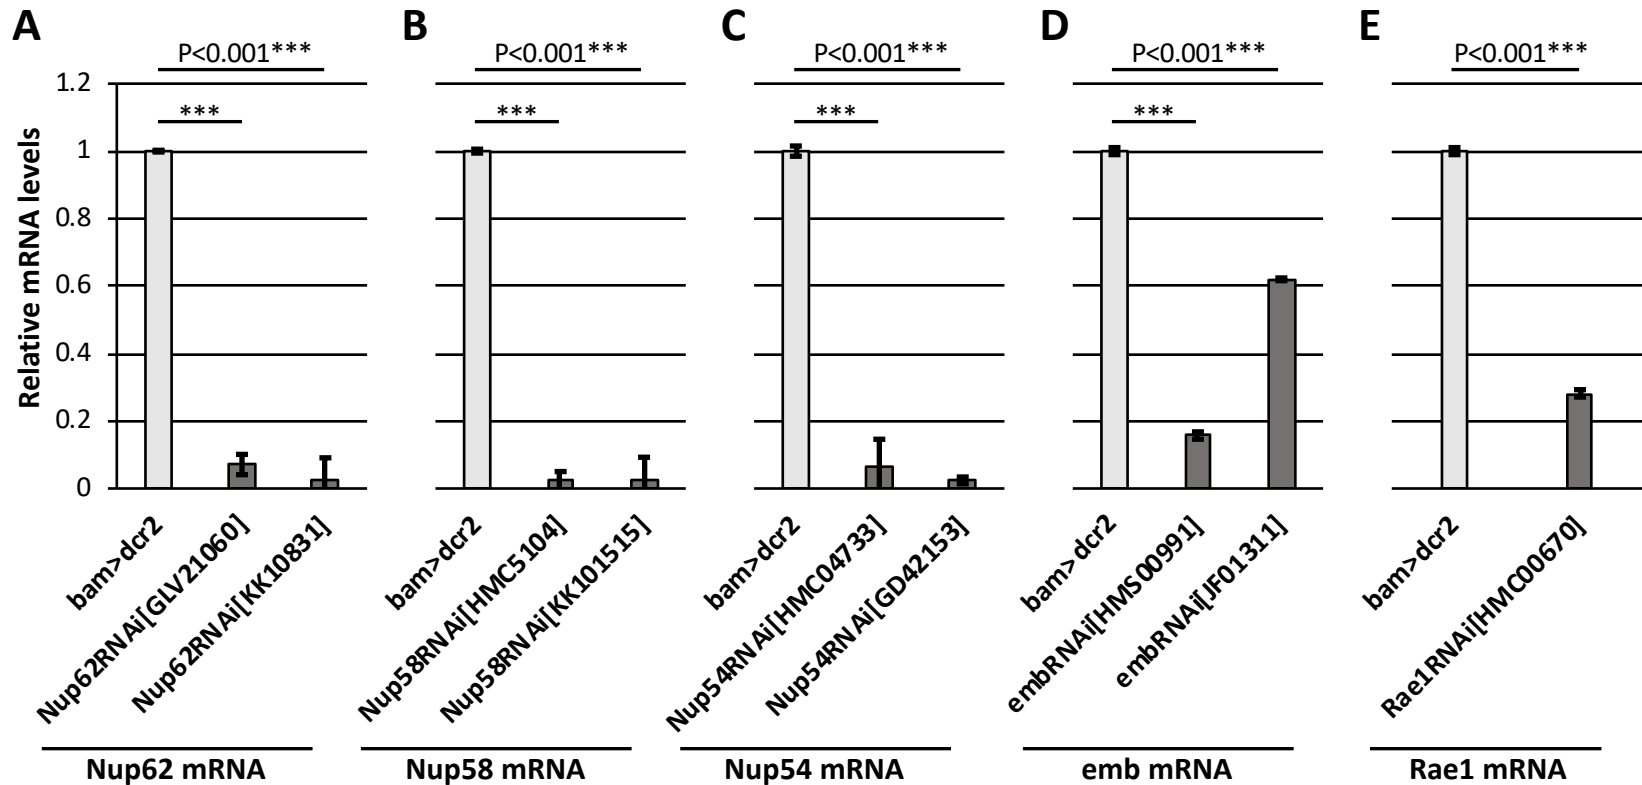

Supplementary Fig.2 Okazaki et al.,

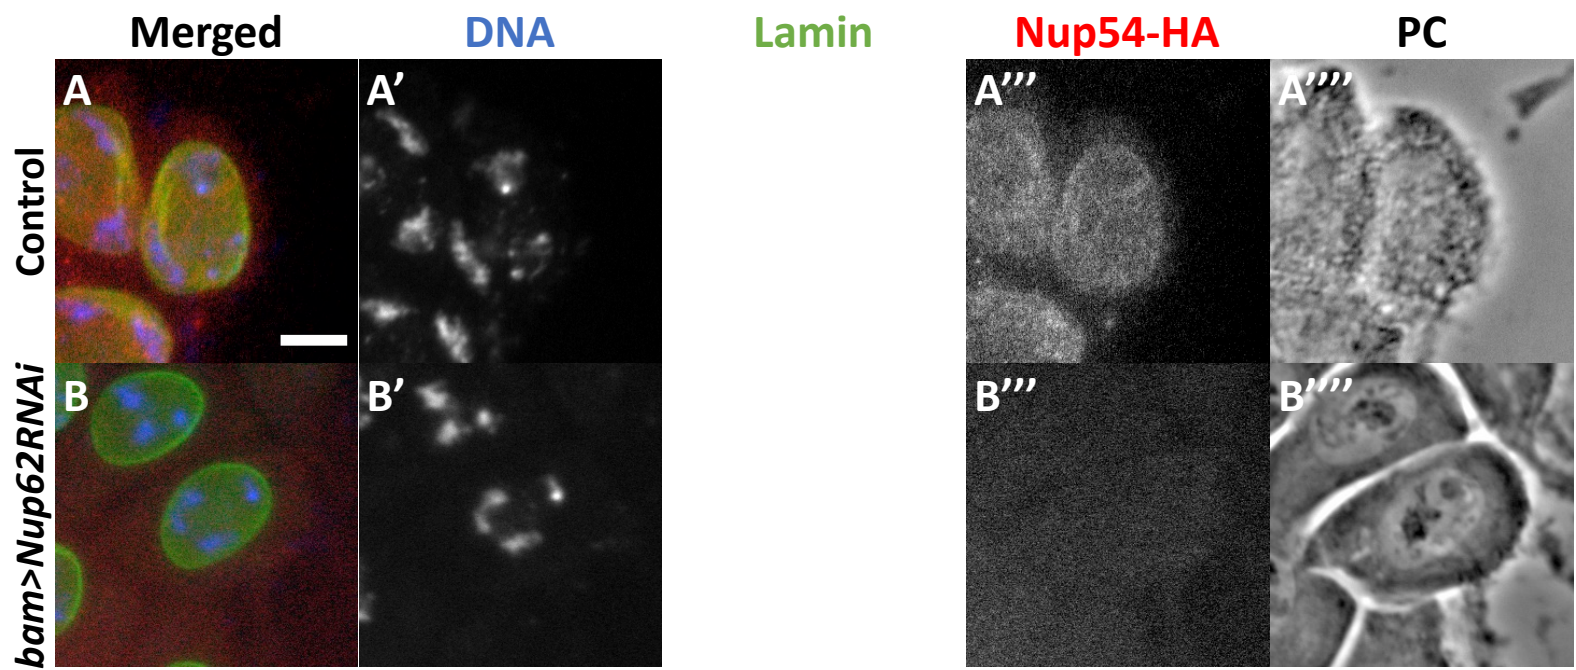

Control (*nos>dcr2*)

*nos>dcr2, Nup62RNAi*

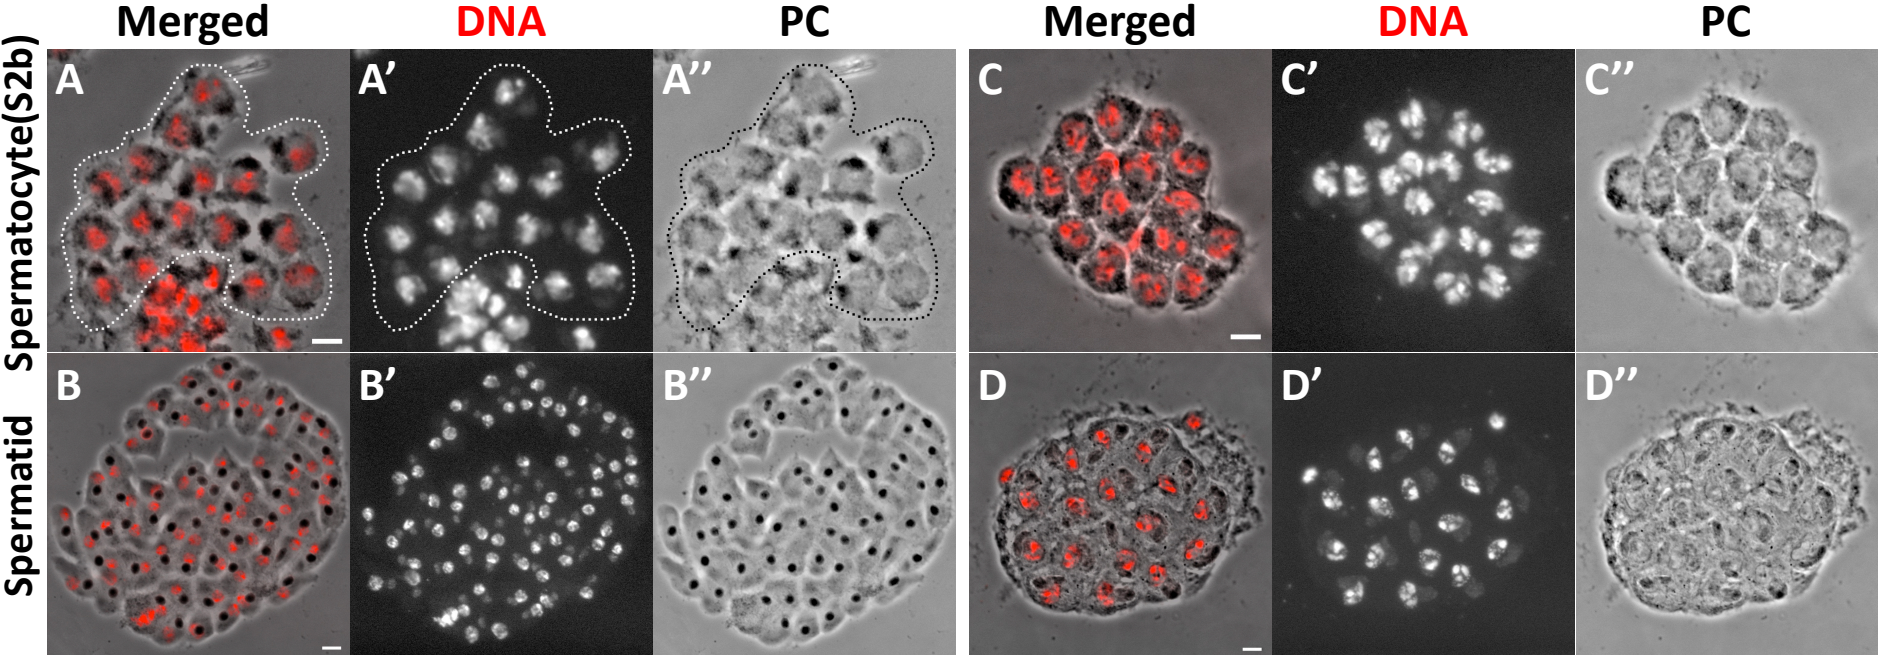

Supplement: Supplementary file 2 [file supplementary]
